# Supplementary material for: Sequence and structural conservation reveal fingerprint residues in TRP channels
Source: eLife. 2022 Jun 10;11:e73645. doi: 10.7554/eLife.73645 (PMC9242649; doi:10.7554/eLife.73645)
Supplement: Supplementary file 1. [file elife-73645-supp1.xlsx]

## Sheet: Sheet1
Supplementary Table S1. Accession numbers of the TRPs genes used in this study
Gene symbol	Unicellular sequence name	Scientific name	Common name	OMA PROTEIN ID/GenBank/Ensembl Gene
MCOLN1		Homo sapiens	Human	ENSG00000090674
MCOLN2		Homo sapiens	Human	ENSG00000153898
MCOLN3		Homo sapiens	Human	ENSG00000055732
MCOLN1		Latimeria chalumnae	Coelacanth	XP_006002982.1
MCOLN2		Latimeria chalumnae	Coelacanth	XP_014342647.1
MCOLN3		Latimeria chalumnae	Coelacanth	XP_014342640.1
MCOLN1		Lepisosteus oculatus	Spotted gar	XP_015204501.1
MCOLN2		Lepisosteus oculatus	Spotted gar	XP_015210872.1
MCOLN3		Lepisosteus oculatus	Spotted gar	XP_015210611.1
MCOLN1		Callorhinchus milii	elephant fish	XP_007909912.1
MCOLN2		Callorhinchus milii	elephant fish	XP_007885392.1
MCOLN3		Callorhinchus milii	elephant fish	XP_007885391.1
PKD2		Homo sapiens	Human	ENSG00000118762
PKD2L1		Homo sapiens	Human	ENSG00000107593
PKD2L2		Homo sapiens	Human	ENSG00000078795
PKD2		Latimeria chalumnae	Coelacanth	XP_006007388.1
PKD2L1		Latimeria chalumnae	Coelacanth	XP_014341843.1
PKD2L2		Latimeria chalumnae	Coelacanth	XP_005989417.1
PKD2		Lepisosteus oculatus	Spotted gar	XP_006630139.1
PKD2L1		Lepisosteus oculatus	Spotted gar	XP_015203008.1
PKD2L2		Lepisosteus oculatus	Spotted gar	XP_015205285.1
PKD2		Callorhinchus milii	Elephant fish	XP_007890233.1
PKD2L1		Callorhinchus milii	Elephant fish	XP_007897917.1
PKD2L2		Callorhinchus milii	Elephant fish	XP_007899556.1
TRPA1		Homo sapiens	Human	ENSG00000104321
TRPA1		Latimeria chalumnae	Coelacanth	XP_014342061.1
TRPA1		Lepisosteus oculatus	Spotted gar	XP_006634049.1
TRPA1		Callorhinchus milii	Elephant fish	XP_007885526.1
TRPC1		Homo sapiens	Human	ENSG00000144935
TRPC3		Homo sapiens	Human	ENSG00000138741
TRPC4		Homo sapiens	Human	ENSG00000133107
TRPC5		Homo sapiens	Human	ENSG00000072315
TRPC6		Homo sapiens	Human	ENSG00000137672
TRPC7		Homo sapiens	Human	ENSG00000069018
TRPC2		Mus musculus	Mouse	ENSMUSG00000100254
TRPC1		Latimeria chalumnae	Coelacanth	XP_006002842.1
TRPC4		Latimeria chalumnae	Coelacanth	XP_006012787.1
TRPC3		Latimeria chalumnae	Coelacanth	XP_006007350.2
TRPC6		Latimeria chalumnae	Coelacanth	XP_014352497.1
TRPC2		Latimeria chalumnae	Coelacanth	XP_006003125.1
TRPC5		Latimeria chalumnae	Coelacanth	XP_014339491.1
TRPC5		Latimeria chalumnae	Coelacanth	XP_006000310.1
TRPC7		Latimeria chalumnae	Coelacanth	XP_006011645.1
TRPC1		Lepisosteus oculatus	Spotted gar	XP_006637772.1
TRPC4		Lepisosteus oculatus	Spotted gar	XP_006628285.1
TRPC5		Lepisosteus oculatus	Spotted gar	XP_015206809.1
TRPC6		Lepisosteus oculatus	Spotted gar	XP_015197190.1
TRPC7		Lepisosteus oculatus	Spotted gar	XP_015205153.1
TRPC3		Lepisosteus oculatus	Spotted gar	XP_006629229.2
TRPC2		Lepisosteus oculatus	Spotted gar	XP_015196659.1
TRPC1		Callorhinchus milii	Elephant fish	XP_007890880.1
TRPC5		Callorhinchus milii	Elephant fish	XP_007892158.1
TRPC4		Callorhinchus milii	Elephant fish	XP_007889426.1
TRPC6		Callorhinchus milii	Elephant fish	XP_007900054.1
TRPC7		Callorhinchus milii	Elephant fish	XP_007899534.1
TRPC3		Callorhinchus milii	Elephant fish	XP_007906461.1
TRPC2		Callorhinchus milii	Elephant fish	XP_007910239.1
TRPM1		Homo sapiens	Human	ENSG00000134160
TRPM2		Homo sapiens	Human	ENSG00000142185
TRPM3		Homo sapiens	Human	ENSG00000083067
TRPM4		Homo sapiens	Human	ENSG00000130529
TRPM5		Homo sapiens	Human	ENSG00000070985
TRPM6		Homo sapiens	Human	ENSG00000119121
TRPM7		Homo sapiens	Human	ENSG00000092439
TRPM8		Homo sapiens	Human	ENSG00000144481
TRPM1		Latimeria chalumnae	Coelacanth	XP_014348116.1
TRPM2		Latimeria chalumnae	Coelacanth	XP_014345762.1
TRPM3		Latimeria chalumnae	Coelacanth	XP_014347481.1
TRPM4a		Latimeria chalumnae	Coelacanth	XP_005990988.1
TRPM5		Latimeria chalumnae	Coelacanth	XP_014344856.1
TRPM6		Latimeria chalumnae	Coelacanth	XP_014349563.1
TRPM7		Latimeria chalumnae	Coelacanth	XP_014340312.1
TRPM1		Latimeria chalumnae	Coelacanth	XP_014348370.1
TRPM3		Latimeria chalumnae	Coelacanth	XP_014339893.1
TRPM8		Latimeria chalumnae	Coelacanth	XP_014345846.1
TRPM1		Lepisosteus oculatus	Spotted gar	XP_006629107.1
TRPM2		Lepisosteus oculatus	Spotted gar	XP_015214648.1
TRPM3		Lepisosteus oculatus	Spotted gar	XP_015222993.1
TRPM4		Lepisosteus oculatus	Spotted gar	XP_015208857.1
TRPM6		Lepisosteus oculatus	Spotted gar	XP_015222646.1
TRPM5		Lepisosteus oculatus	Spotted gar	XP_015193971.1
TRPM1		Callorhinchus milii	Elephant fish	XP_007907056.1
TRPM2		Callorhinchus milii	Elephant fish	XP_007888803.1
TRPM3		Callorhinchus milii	Elephant fish	XP_007904772.1
TRPM4		Callorhinchus milii	Elephant fish	XP_007884444.1
TRPM5		Callorhinchus milii	Elephant fish	XP_007902997.1
TRPM6		Callorhinchus milii	Elephant fish	XP_007897564.1
TRPM7		Callorhinchus milii	Elephant fish	XP_007903830.1
TRPM4		Callorhinchus milii	Elephant fish	XP_007909973.1
TRPM4		Callorhinchus milii	Elephant fish	XP_007884235.1
TRPV1		Homo sapiens	Human	ENSG00000196689
TRPV2		Homo sapiens	Human	ENSG00000187688
TRPV3		Homo sapiens	Human	ENSG00000167723
TRPV4		Homo sapiens	Human	ENSG00000111199
TRPV5		Homo sapiens	Human	ENSG00000127412
TRPV6		Homo sapiens	Human	ENSG00000165125
TRPV4		Latimeria chalumnae	Coelacanth	XP_005999492.1
TRPV3		Latimeria chalumnae	Coelacanth	XP_006010862.1
TRPV1		Latimeria chalumnae	Coelacanth	XP_014354450.1					partial
TRPV5/6		Latimeria chalumnae	Coelacanth	XM_14491642.1
TRPV1		Lepisosteus oculatus	Spotted gar	XP_006641065.1
TRPV4		Lepisosteus oculatus	Spotted gar	XP_006640397.1
TRPV5		Lepisosteus oculatus	Spotted gar	XP_006642484.1
TRPV1		Callorhinchus milii	Elephant fish	XP_007894726.1
TRPV4		Callorhinchus milii	Elephant fish	XP_007900044.1
TRPV3		Callorhinchus milii	Elephant fish	XP_007894728.1
TRPV6		Callorhinchus milii	Elephant fish	XP_007886998.1
TRPN1		Alligator sinensis	Chinese alligator	XM_025214710.1
TRPN1		Latimeria chalumnae	Coelacanth	XM_014497951.1
TRPN1		Nanorana parkeri	High Himalaya frog	XM_018560910.1
TRPN1		Lepisosteus oculatus	Spotted gar	XM_006635845.2
TRPN1		Callorhinchus milii	Elephant fish	XP_007884996.1					TRPN1
	CrTRP13/11304	Chlamydomonas reinhardtii		Phytozome Cre03.g175050.t1.3
	DdTRP1/1823	Dictyostelium discoideum		XP_635110.1
	Mp_ccmpTRP1/11682	Micromonas pusilla		XP_003064374.1
	DpTRP3/1562	Dictyostelium purpureum		XP_003283790.1
	CrTRP6/12799	Chlamydomonas reinhardtii		Phytozome Cre07.g334300.t1.3
	CrTRPP2/11644	Chlamydomonas reinhardtii		Phytozome Cre17.g715300.t1.2
	CrTRP1/1901	Chlamydomonas reinhardtii		JX173491.1, ABG54260.1, Phytozome Cre10.g452950.t1.3
	PtTRP1/1574	Paramecium tetraurelia		XP_001452370.1
	LmexTRP1/1595	Leishmania mexicana		XP_003876399.1
	DdTRP2/1698	Dictyostelium discoideum		XP_644933.1
	LmTRP1/1590	Leishmania major		XP_001684103.1
	TcTRP1/1494	Trypanosoma cruzi		ADWP02012431
	Mp_rccTRP2/12300	Micromonas pusilla		XP_002506421.1
	VcTRP3/12723	Volvox carteri		XP_002947703.1
	TcCLTRP1/1494	Trypanosoma cruzi		XP_804976.1
	PtTRP3/1849	Paramecium tetraurelia		XP_001429751.1
	LiTRP1/1590	Leishmania infantum		XP_001470439.1
	CsTRP2/1569	Coccomyxa subellipsoidea		XP_005643399.1
	CrTRP22/12986	Chlamydomonas reinhardtii		Phytozome Cre02.g112200.t1.2
	TcCLTRP2/1494	Trypanosoma cruzi		XP_804854.1
	LmexTRP2/11834	Leishmania mexicana		XP_003872242.1
	DpTRP2/1759	Dictyostelium purpureum		XP_003289259.1
TRPVL		Hydra vulgaris	Swiftwater hydra	XP_002168781.2
TRPVL		Nematostella vectensis	Starlet sea anemone	XP_032222722.1
TRPVL		Orbicella faveolata	Mountainous star coral	XP_020619676.1
TRPVL		Dendronephthya gigantea	Coral	XP_028405944.1
TRPVL		Capitella teleta	Polychaete worm	ELU06894.1
TRPVL		Dimorphilus gyrociliatus	Dimorphilus gyrociliatus	CAD5123450.1
TRPS		Caenorhabditis elegans	Caenorhabditis elegans	P34641.1
TRPS		Caenorhabditis nigoni	Caenorhabditis nigoni	PIC39172.1
TRPS		Branchiostoma belcheri	Amphioxus	XP_19643532.1
TRPS		Trichonephila clavipes	Golden silk orbweaver	PRD37692.1
TRPS		Octopus vulgaris	Common octopus	XP_29638531.1
TRPS		Mizuhopecten yessoensis	Japanese scallop	OWF47104.1
TRPS		Mizuhopecten yessoensis	Japanese scallop	XP_21360214.1
TRPS		Pristionchus pacificus	Parasitic nematode	PDM65852.1
TRPS		Ancylostoma ceylanicum	Hookworm of human	EYC40953.1
TRPS		Parasteatoda tepidariorum	Common house spider	XP_15907226.1
TRPS		Dermatophagoides pteronyssinus	European house dust mite	XP_27204088.1
TRPS		Galendromus occidentalis	Western Predatory Mite	XP_18495285.2
TRPS		Strigamia maritima	Coastal centipede	SMAR010526
TRPS		Strigamia maritima	Coastal centipede	SMAR006477
TRPS		Branchiostoma floridae	Florida lancelet	XP_035685384.1
TRPS		Hypsibius dujardini	Water bear	OQV20961.1
TRPS		Priapulus caudatus	Priapulus caudatus	XP_014670278.1
TRPgamma		Drosophila melanogaster	Fruit fly	NP_609802.1
TRPgamma		Drosophila mauritiana	Fruit fly	XP_033173512.1
TRPgamma		Teleopsis dalmanni	Malaysian stalk-eyed fly	XP_037959984.1
TRPgamma		Centruroides sculpturatus	Bark scorpion	XP_023217963.1
TRPgamma		Limulus polyphemus	Atlantic horseshoe crab	XP_013791151.2
Yvc1p		Saccharomyces cerevisiae S288C	Baker's yeast	NP_014730.2
Yvc1p		Saccharomyces cerevisiae	Baker's yeast	GHM91739.1
Yvc1p		Saccharomyces pastorianus	Lager yeast	QID82427.1
Yvc1p		Candida glabrata	Yeast	XP_448082.1
Yvc1p		Candida glabrata	Yeast	KTB11272.1
Yvc1p		Colletotrichum graminicola	Maize anthracnose fungus	XP_008097990.1
Yvc1p		Colletotrichum incanum	Colletotrichum incanum	KZL78996.1
Yvc1p		Colletotrichum tofieldiae	Colletotrichum tofieldiae	KZL77822
KCNA2		Ailuropoda melanoleuca	Panda	AILME03430/ENSAMEG00000020085
KCNA2		Canis lupus familiaris	Dog	CANLF16803/ENSCAFG00000019777
KCNA2		Felis catus	Cat	FELCA09465/ENSFCAG00000004708
KCNA2		Myotis lucifugus	Microbat	MYOLU07349/ENSMLUG00000003070
KCNA2		Mus musculus	Mouse	MOUSE31141/ENSMUSG00000040724.5
KCNA2		Bos taurus	Cow	BOVIN14107/ENSBTAG00000015459.6
KCNA2		Homo sapiens	Human	HUMAN01399/ENSG00000177301.16
KCNA2		Ovis aries	Sheep	SHEEP00641/ENSOARG00000011730
KCNA2		Mustela putorius furo	Ferret	MUSPF05978/ENSMPUG00000019908
KCNA2		Sus scrofa	Pig	PIGXX24491/ENSSSCG00000037709.1
SCN8A		Ailuropoda melanoleuca	Panda	AILME10395/ENSAMEG00000001854
SCN8A		Bos taurus	Cow	BOVIN15621/ENSBTAG00000021339.7
SCN8A		Sus scrofa	Pig	PIGXX25319/ENSSSCG00000000228.3
SCN8A		Homo sapiens	Human	HUMAN06428/ENSG00000196876.18
SCN8A		Canis lupus familiaris	Dog	CANLF10791/ENSCAFG00000007600
SCN8A		Mustela putorius furo	Ferret	MUSPF03966/ENSMPUG00000007873
SCN8A		Felis catus	Cat	FELCA07905/ENSFCAG00000004415
SCN8A		Ovis aries	Sheep	SHEEP14304/ENSOARG00000017269
SCN8A		Mus musculus	Mouse	MOUSE14758/ENSMUSG00000023033.14
SCN8A		Myotis lucifugus	Microbat	MYOLU09446/ENSMLUG00000009841
